# Supplementary material for: Two distinct modes of DNMT1 recruitment ensure stable maintenance DNA methylation
Source: PubMed Central journal article supplement (PMC7060239; doi:10.1038/s41467-020-15006-4), 2020-03-06
Supplement: 41467_2020_15006_MOESM1_ESM.pdf [file 41467_2020_15006_MOESM1_ESM.pdf]

## **Supplementary Information**

**Two distinct modes of DNMT1 recruitment ensure  
stable maintenance DNA methylation**

**Nishiyama et al.**

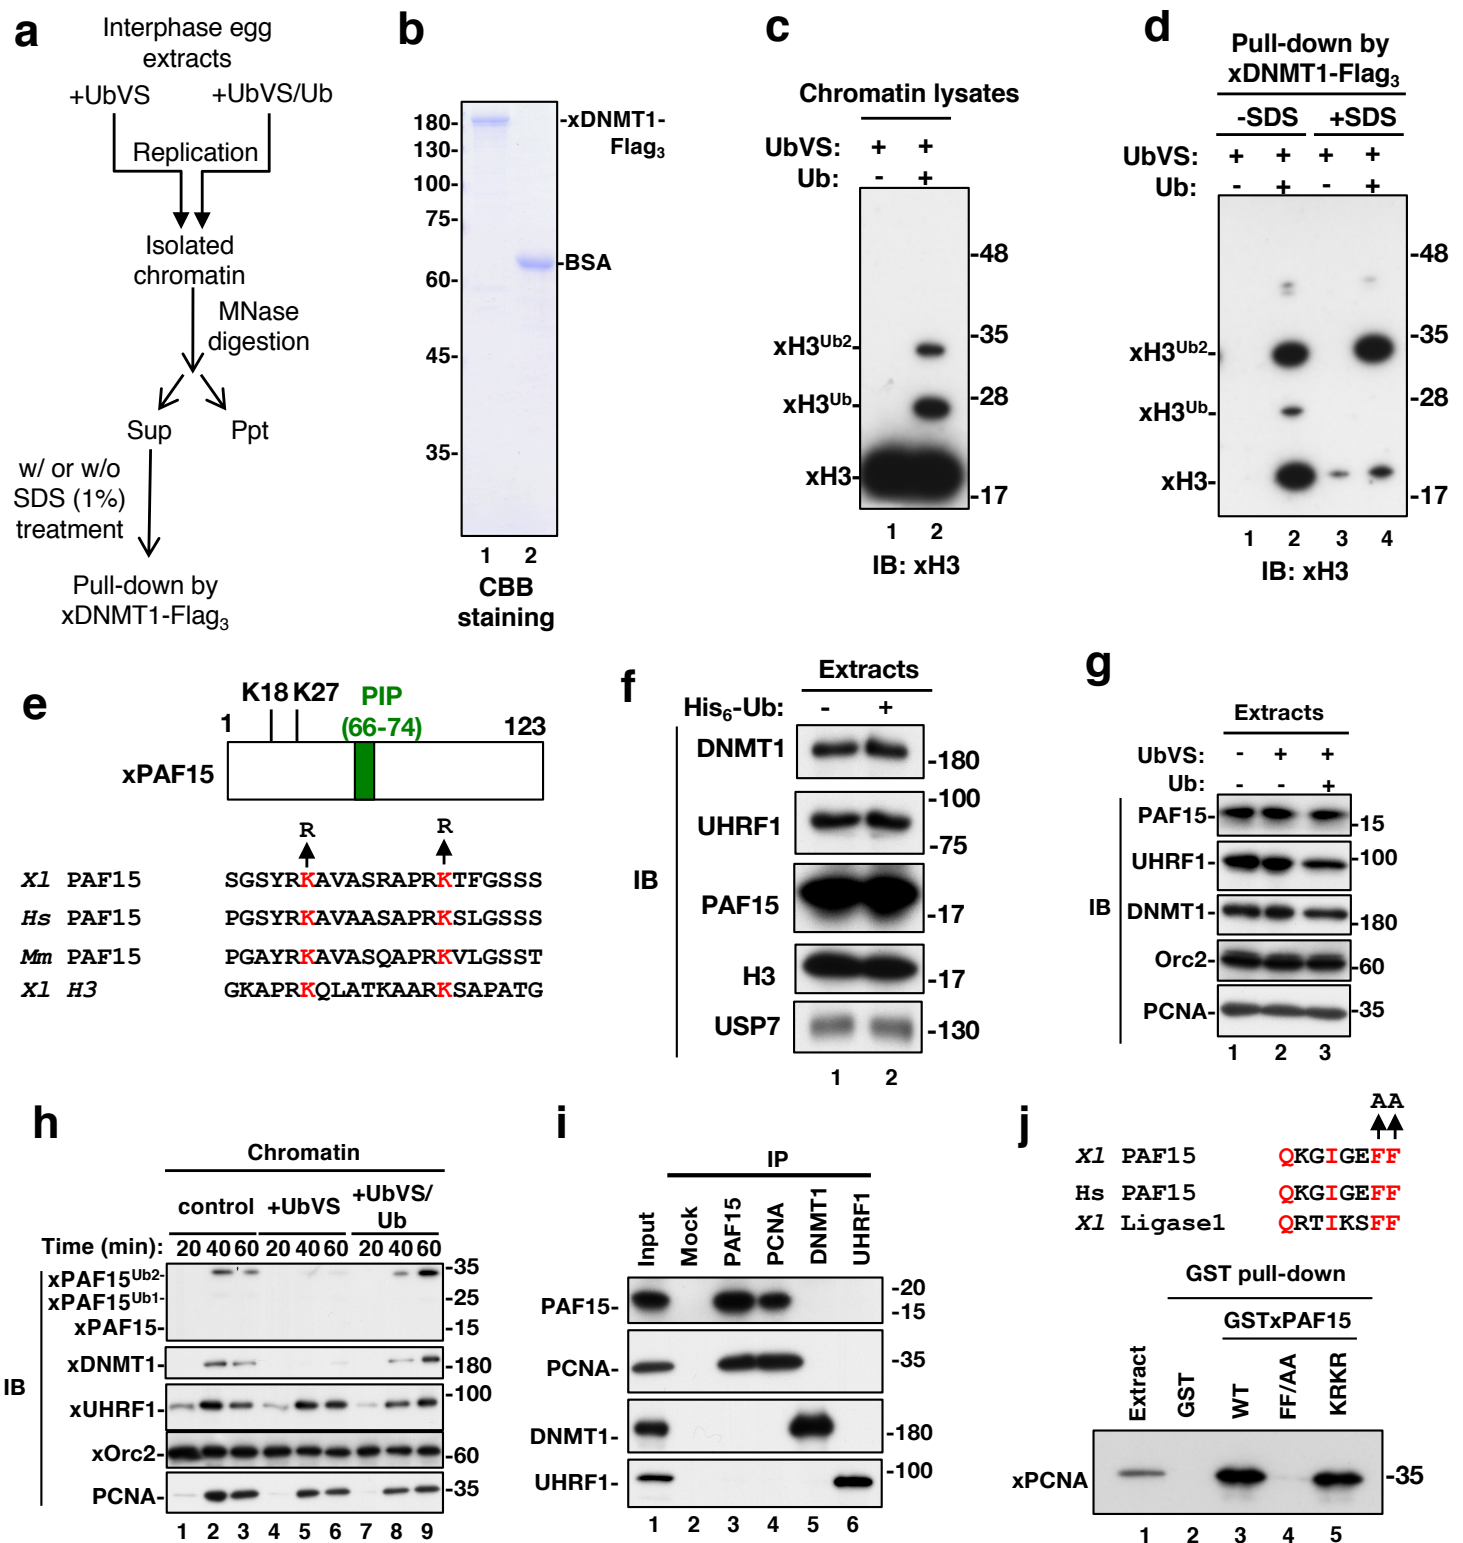

**Supplementary Fig. 1 | Isolation of ubiquitin signaling-dependent DNMT1-interacting proteins from chromatin lysates, and characterization of xPAF15.** **a**, Schematic of assay to isolate DNMT1-interacting proteins from chromatin lysates. **b**, 1  $\mu$ g of recombinant xDNMT1-Flag<sub>3</sub> (lane 1), and BSA were separated by SDS-PAGE, and gel was stained with CBB. **c**, Sperm chromatin was added to interphase egg extracts pretreated with UbVS (14  $\mu$ M) in the presence or absence of free ubiquitin (58  $\mu$ M). Isolated chromatin fractions were subjected to MNase digestion and solubilized proteins were analyzed by immunoblotting using anti-histone H3 antibody. **d**, Chromatin lysates were subjected to a pull-down experiment using Flag-tagged recombinant wild-type xDNMT1 coupled with anti-Flag M2 beads. The resultant immunoprecipitates were analyzed by immunoblotting using anti-H3 antibody. **e**, The domain structure of xPAF15 and sequence alignment of the conserved ubiquitylation sites across different species. Ubiquitylation sites are shown in red. **f** and **g**, Extracts used in Fig. 1b and Supplementary Fig. 1h were analyzed by immunoblotting using indicated antibodies. **h**, Sperm chromatin was replicated in interphase egg extracts containing buffer (lanes 1-3) or 14  $\mu$ M UbVS in the absence (lanes 4-6) or presence of 58  $\mu$ M recombinant ubiquitin (lanes 7-9), and chromatin-associated proteins were analyzed by immunoblotting using the indicated antibodies. **i**, Immunoprecipitates from *Xenopus* interphase egg extracts using anti-xPAF15 (lane 3), anti-xPCNA (lane 4), anti-xUHRF1 (lane 5), and anti-xDNMT1 (lane 6) antibodies, or control IgG (lane 2) as well as egg extracts (lane 1) were subjected to immunoblotting using the antibodies indicated. **j**, Sequence alignment of the PIP box of PAF15. A PIP box of *Xenopus* DNA ligase 1 (Lig1) is also aligned. Red residues in the PIP boxes are conserved. GST-tagged full-length xPAF15 wild-type (WT, lane 3), F72AF73A(FF/AA, lane 4), or K18RK27R(KRK R, lane 5) were immobilized on GSH beads and incubated with interphase egg extracts. Bound proteins were analyzed by immunoblotting with PCNA antibodies. Source data are provided as a Source Data file.

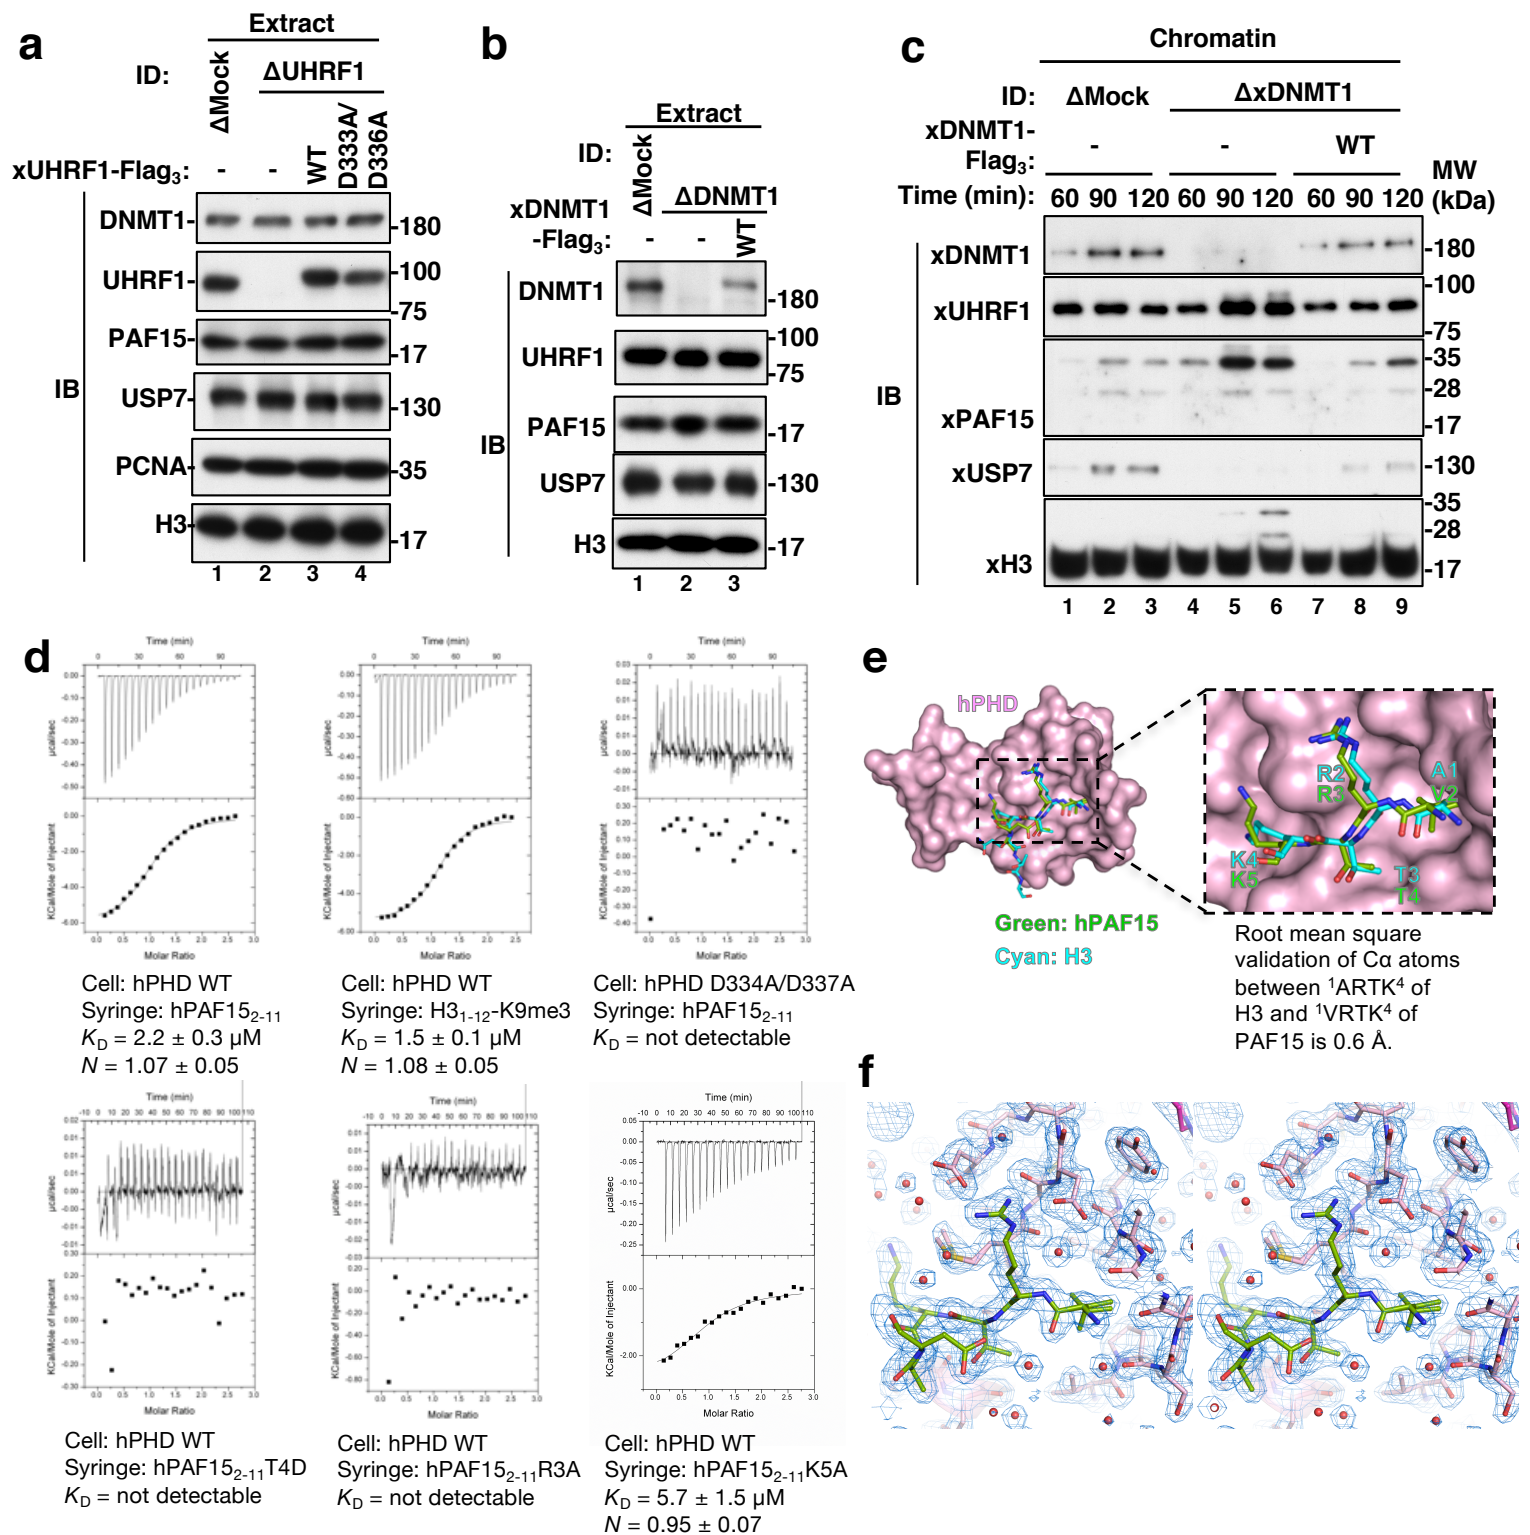

**Supplementary Fig. 2 | UHRF1-dependent regulation of PAF15 in egg extracts, ITC thermograms and a structural comparison**

**a**, Mock- and UHRF1-depleted extracts used as shown in Fig. 2a were analyzed by immunoblotting using the indicated antibodies. **b**, Mock- and DNMT1-depleted extracts used in **c** were analyzed by immunoblotting using the indicated antibodies. **c**, Mock-depleted or DNMT1-depleted extracts were supplemented with the indicated recombinant proteins (wt xDNMT1) and chromatin was isolated. Chromatin-bound proteins were analyzed by immunoblotting using the indicated antibodies. **d**, Representative ITC thermograms (upper) and plots of corrected heat values (lower) for the indicated binding experiments. The first data point of each measurement was omitted from the plots in the lower panels and parameter fittings. **e**, Crystal structure of hPHD (pink surface model) in complex with PAF15<sub>2-11</sub> is superposed on that in complex with H3 peptide (PDB: 3ASL [<https://www.rcsb.org/structure/3ASL>]). Close-up view shows a structural comparison of the 1-4 N-terminal residues of H3 (cyan) and PAF15 (green). **f**, Stereo view of the PAF15 recognition site of hPHD. hPHD and PAF15 are depicted as light-pink and green stick models, respectively. water molecules are shown as red sphere. 2|Fo| - |Fc| map contoured at 1.0  $\sigma$  (light-blue) is superimposed on the models. Source data are provided as a Source Data file.

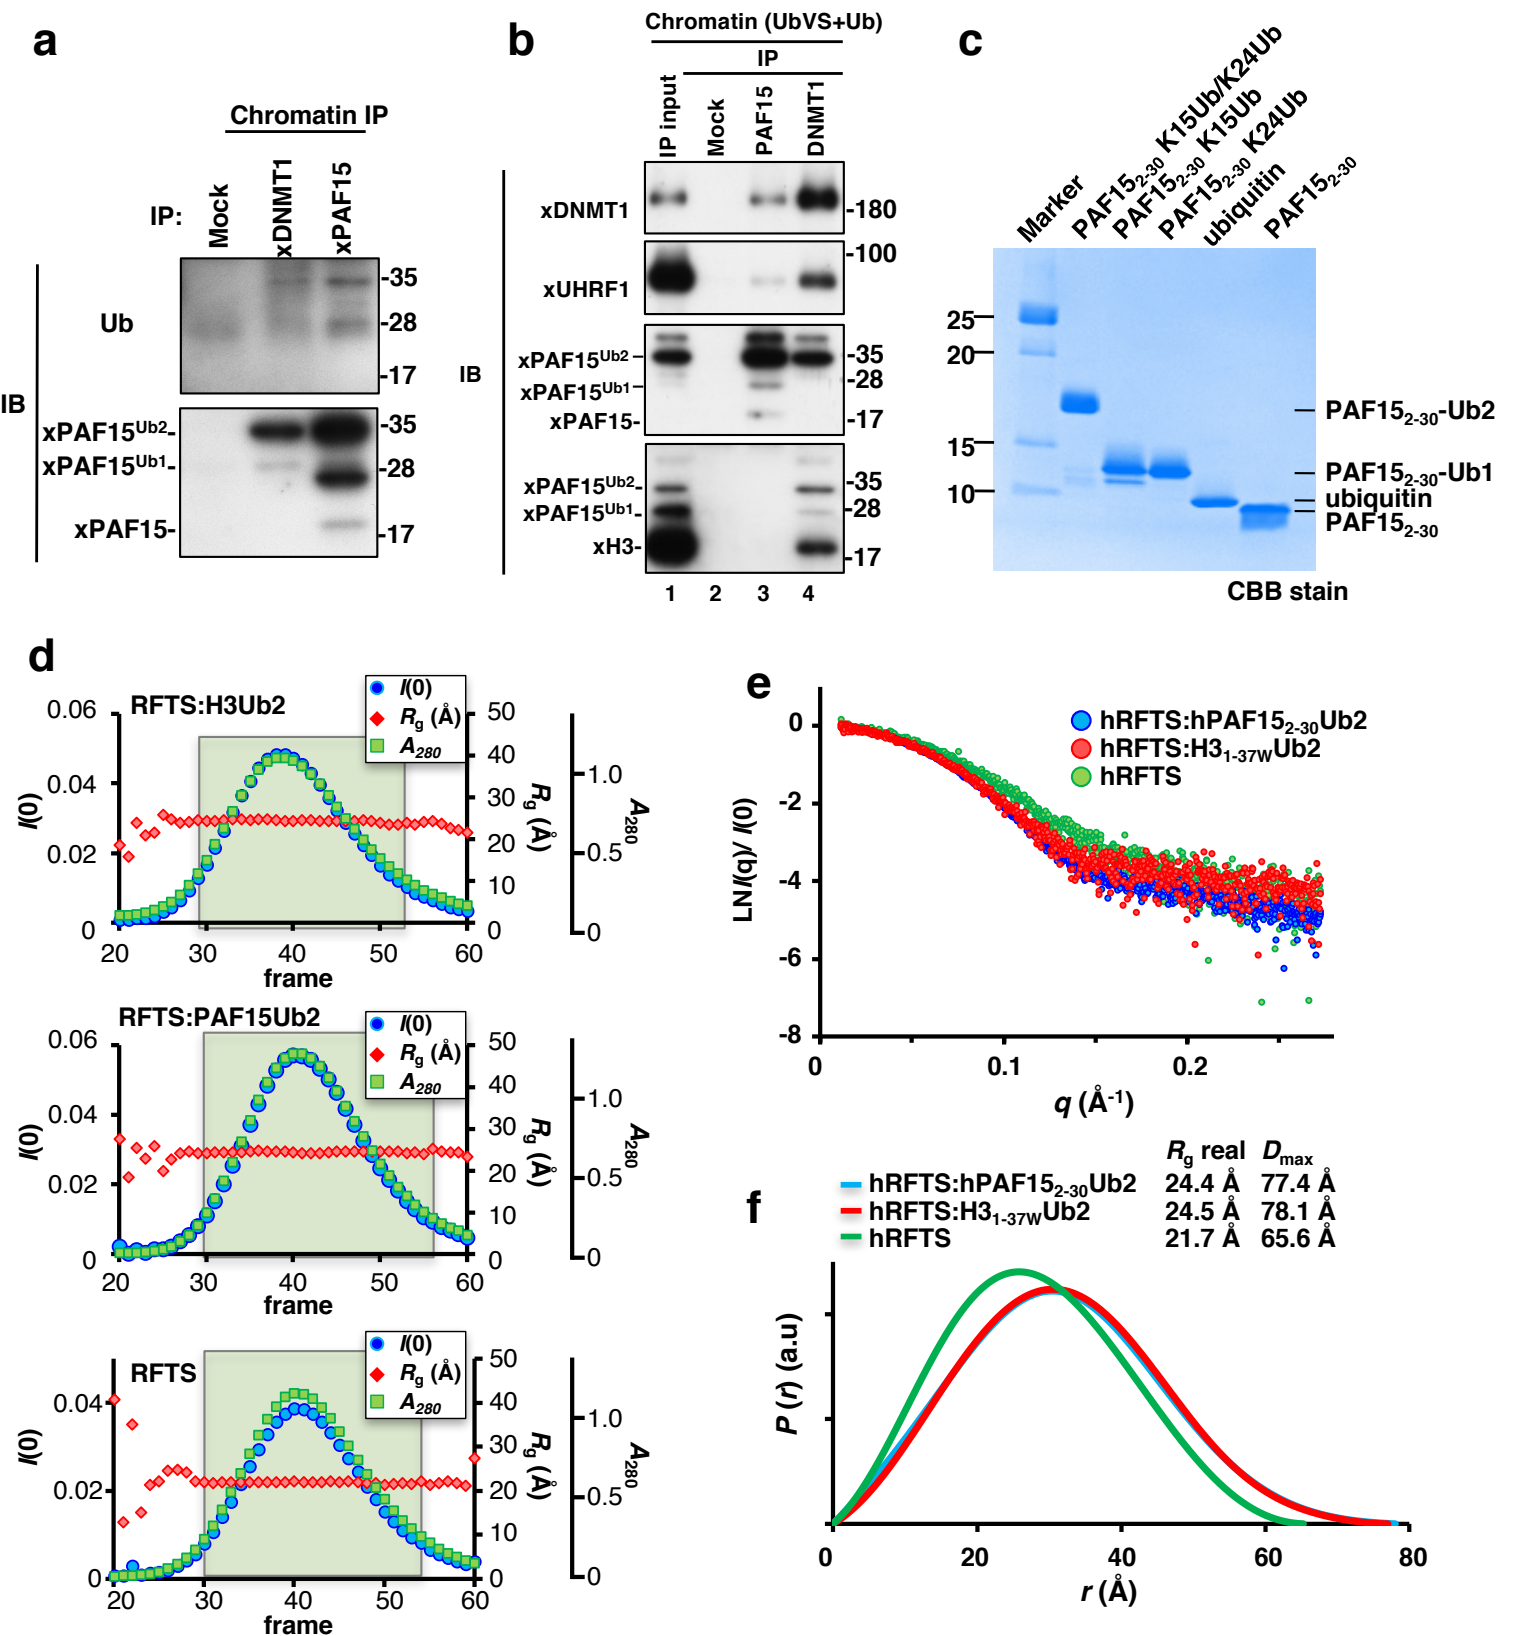

**Supplementary Fig. 3 | DNMT1 specifically interacts with two mono-ubiquitylated PAF15**

**a**, Immunoprecipitates from chromatin lysates (Chromatin-IP) with control (Mock), anti-xDNMT1 (DNMT1), or anti-xPAF15 (PAF15) antibody were analyzed by immunoblotting. **b**, Sperm chromatin was replicated in interphase egg extracts containing 14  $\mu$ M UbVS and 0.2 mg/ml ubiquitin. Isolated and solubilized chromatin proteins were subjected to immunoprecipitation using anti-PAF15 or DNMT1 antibodies. The resultant immunoprecipitates were analyzed by immunoblotting using the indicated antibodies. **c**, Purity check of disulfide-mediated ubiquitylated PAF15 analyzed by SDS-PAGE under oxidative condition. **d**,  $R_g$  (blue) and  $I(0)$  (red) plots for SEC-SAXS of hRFTS:H3<sub>1-37W</sub>Ub2 (top), hRFTS:PAF15<sub>2-30</sub>Ub2 (middle), and RFTS (bottom). X-ray scattering frames highlighted as green were used for extrapolation to zero-concentrations. **e**, Experimental X-ray scattering curves of hRFTS:hPAF15<sub>2-30</sub>Ub2 (cyan circle), hRFTS:H3<sub>1-37W</sub>Ub2 (red circle) and apo-hRFTS (green circle). The  $q$ -range is scattering curves are collected from 0.0113 to 0.2729  $\text{\AA}^{-1}$ . Vertical and horizontal axes indicate absolute intensity  $\ln(I(q)/I(0))$  and scattering angle  $q = 4\pi\sin\theta/\lambda$ , respectively. **f**, Pair distance distribution functions  $P(r)$  of hRFTS:PAF15<sub>2-30</sub>Ub2 (cyan), hRFTS:H3<sub>1-37W</sub>Ub2 (red) and hRFTS alone (green) determined from SAXS data. The  $P(r)$  functions were normalized by  $I(0)$  calculated from each scatter plot. Source data are provided as a Source Data file.



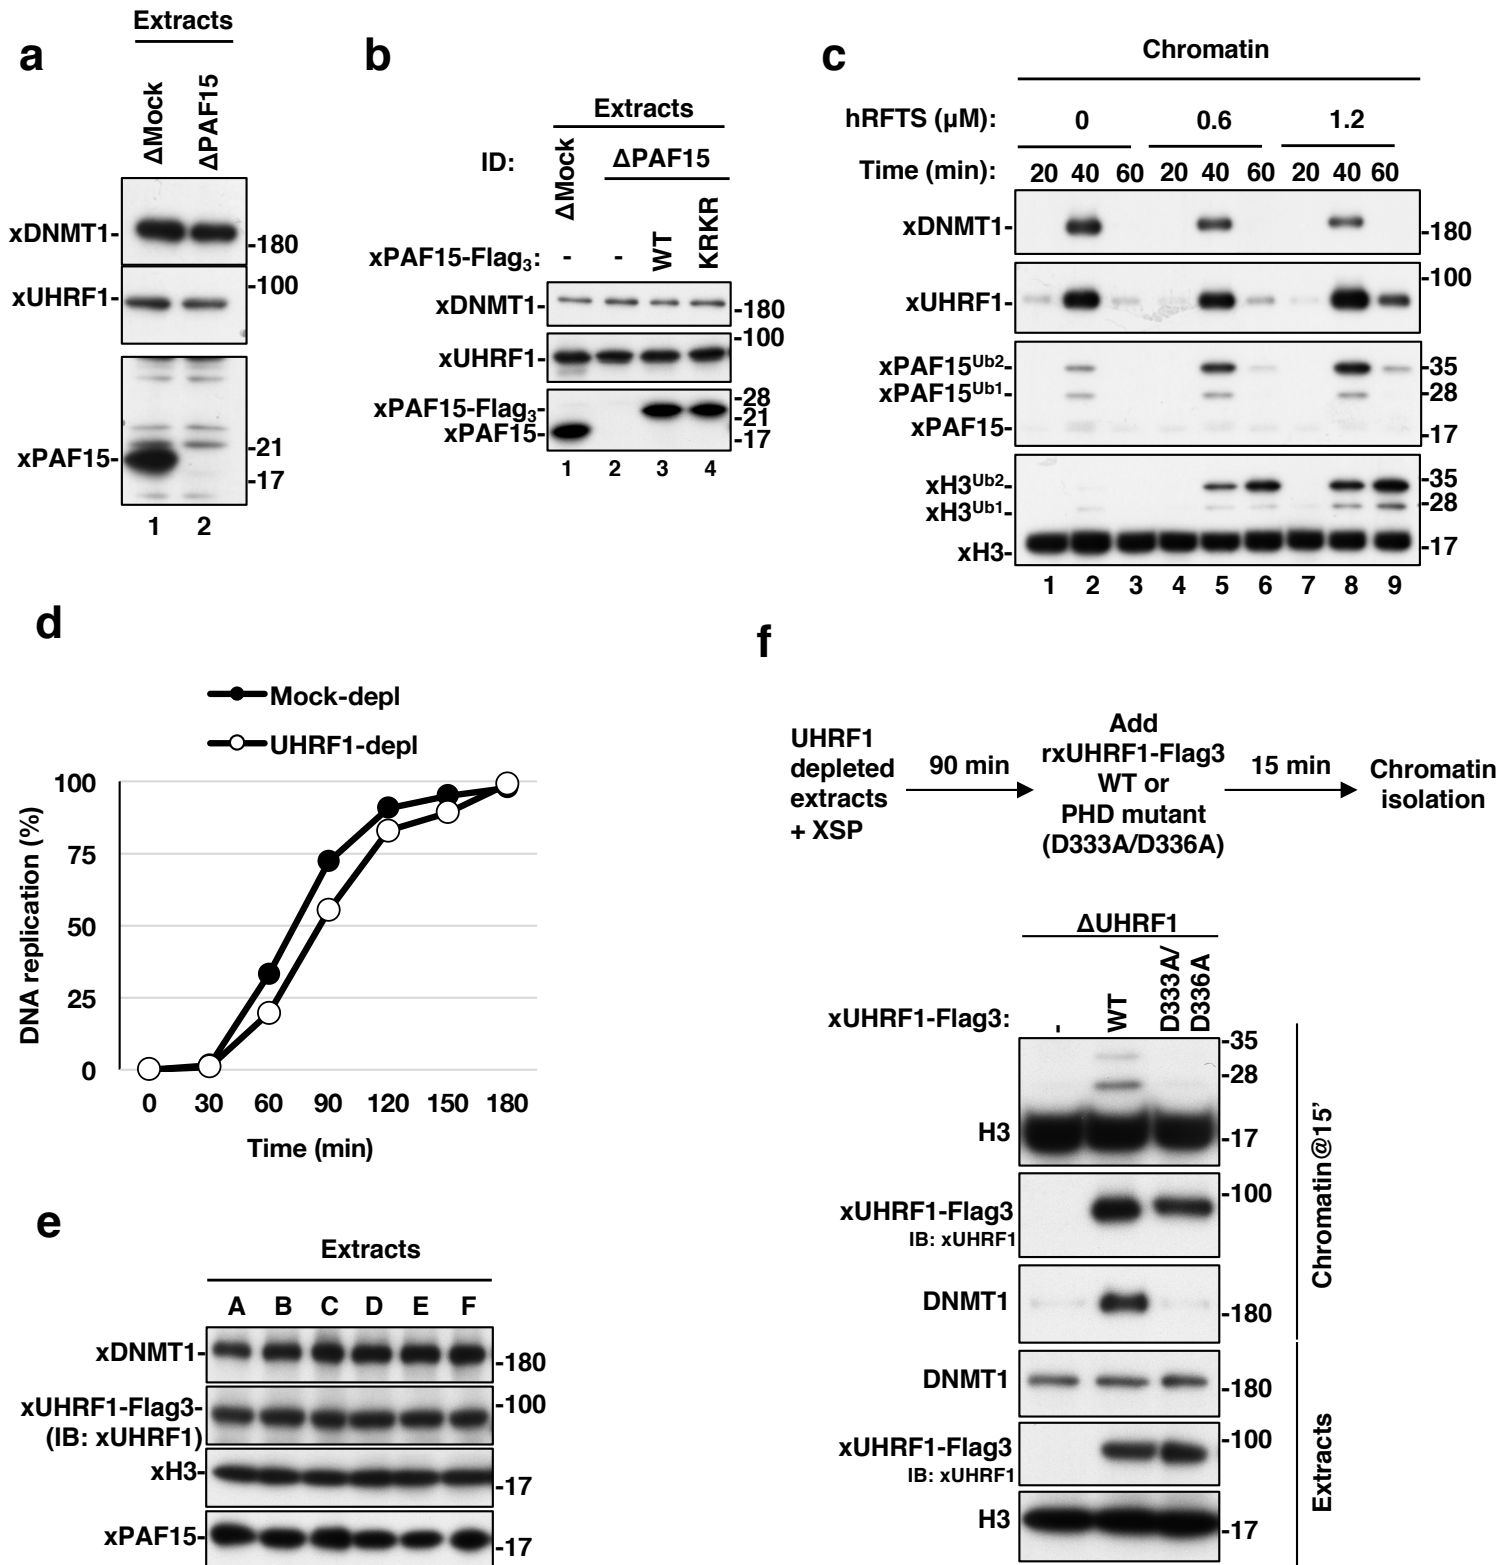

**Supplementary Fig. 4 | Immunodepletion of xPAF15 or UHRF1 from *Xenopus* interphase egg extracts and effect of recombinant hRFTS addition to *Xenopus* egg extracts**

**a**, 0.25 μl of mock-depleted or xPAF15-depleted interphase egg extracts were immunoblotted with the indicated antibodies. **b**, Mock- and PAF15-depleted extracts used in Figure 4b were analyzed by immunoblotting using the indicated antibodies. **c**, Interphase egg extracts containing 0.6 or 1.2 μM hRFTS were treated with sperm chromatin. Chromatin fractions were isolated at the indicated times and analyzed by immunoblotting. **d**, Sperm chromatin was incubated in the indicated interphase egg extracts in the presence of [ $\alpha$ -<sup>32</sup>P]dCTP. The percentage of input DNA replicated at various times is plotted. **e**, Extracts used in Fig. 4f and g were analyzed by immunoblotting using the indicated antibodies. **f**, Schematic of experimental approach to test the role of UHRF1 in histone H3 ubiquitylation. Sperm chromatin was added to xUHRF1-depleted extracts which were incubated for 90 min. The extracts were then supplemented with recombinant xUHRF1-Flag<sub>3</sub>-WT or -D333A/D336A and further incubated for 15 min. Chromatin fractions were isolated and chromatin-bound proteins were analyzed by immunoblotting using the antibodies indicated. Extracts were also analyzed by immunoblotting. Source data are provided as a Source Data file.

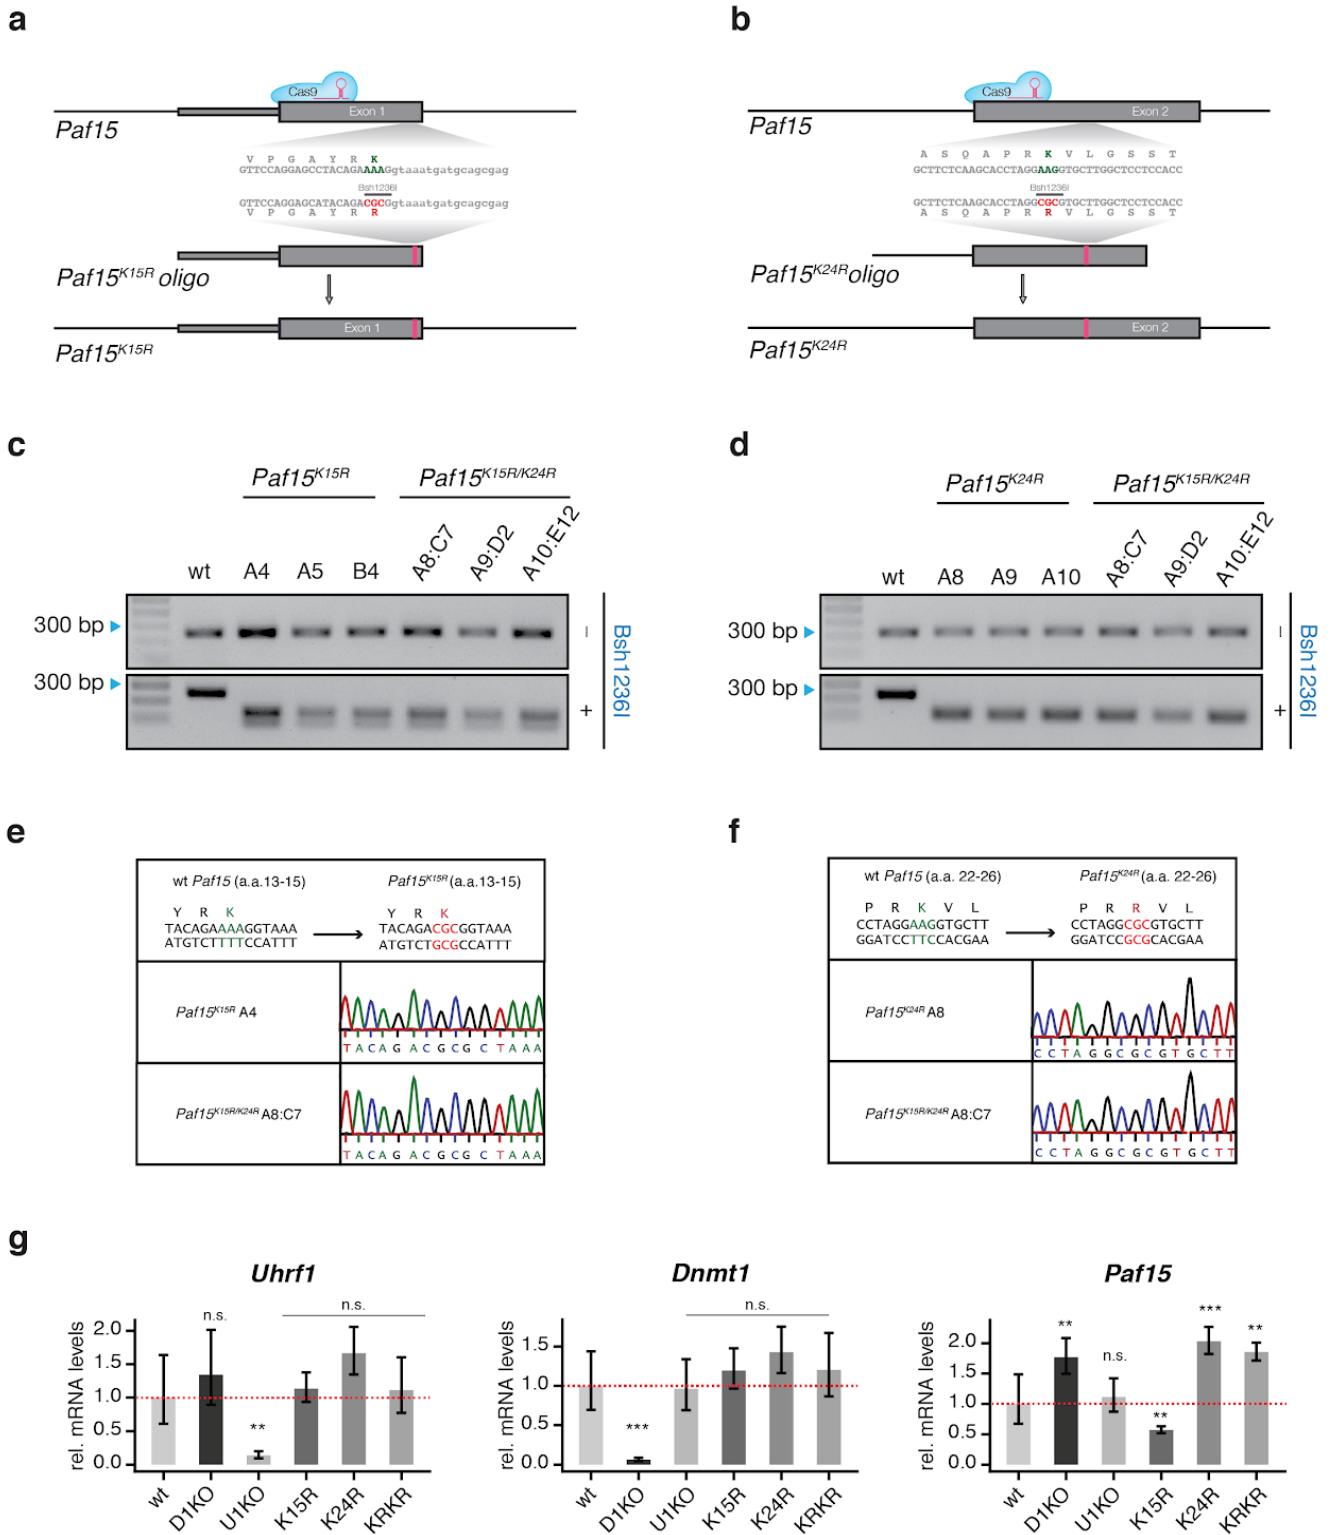

**Supplementary Fig. 5 | Generation and characterization of *Paf15*<sup>K15R</sup>, *Paf15*<sup>K24R</sup>, and *Paf15*<sup>K15R/K24R</sup> (KRKR) mutant mESCs.**

**a,b.** Schematic representation of the CRISPR/Cas9 gene editing strategy used for generating *Paf15* (**a**) K15R and (**b**) K24R substitutions in mouse embryonic stem cells (mESCs). Restriction enzyme recognition sites generated by gene editing for restriction fragment length polymorphism (RFLP) screening and amino acid substitutions are shown. **c,d.** Genotyping of (**c**) *Paf15*<sup>K15R</sup> and (**d**) *Paf15*<sup>K24R</sup> mutant clones via RFLP analysis. **e,f.** Confirmation of successful insertion of (**e**) K15R and (**f**) K24R substitutions in the indicated *Paf15* mutants as assessed by Sanger sequencing. **g.** Expression of *Uhrf1*, *Dnmt1*, and *Paf15* in wt, *Dnmt1* KO (D1KO), *Uhrf1* KO (U1 KO), *Paf15*<sup>K15R</sup> (K15R), *Paf15*<sup>K24R</sup> (K24R) and *Paf15*<sup>K15R/K24R</sup> (KRKR) mESCs as assessed by qRT-PCR. Error bars represent means  $\pm$  SD from n=3 biological replicates. \*\*P < 0.01, \*\*\*P < 0.001, P-values calculated by two-tailed Student's t-test between wild-type and the indicated mutant. n.s., not significant. Source data are provided as a Source Data file.

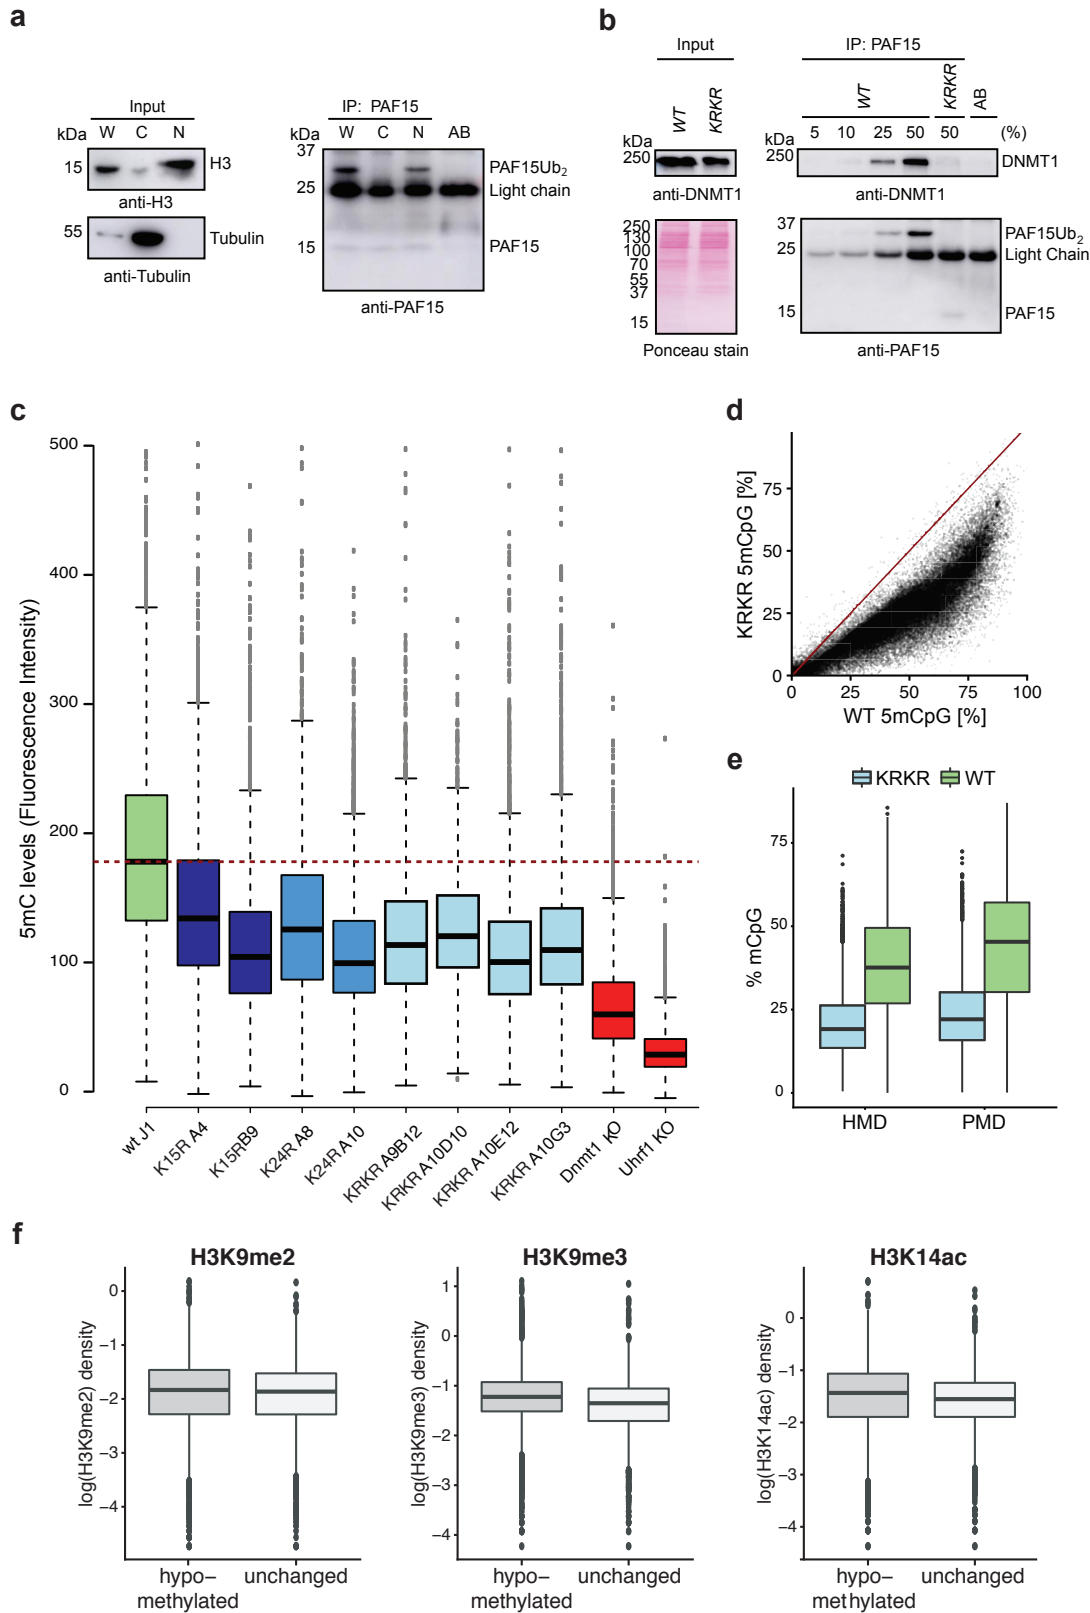

**Supplementary Figure 6: PAF15 dual-monoubiquitylation is critical for interacting with DNMT1 and maintaining global DNA methylation in mouse ESCs**

**a**, Whole-cell (W), cytoplasmic (C), and nuclear (N) extracts from wild-type mESCs were subjected to immunoprecipitation of endogenous mPAF15 using an anti-mPAF15 antibody. mPAF15 was detected in the bound fraction with an anti-mPAF15 antibody. mH3 and mTubulin blots were used as indicators of successful nuclear and cytoplasmic fractionation. AB, antibody. **b**, Immunoprecipitation of endogenous mPAF15 from wild-type (WT) and *Paf15* KRKR (KRKR) mESC nuclear extracts using an anti-mPAF15 antibody. Bound fractions were subjected to immunoblotting with anti-mDNMT1 and anti-mPAF15 antibodies. The anti-mDNMT1 blot and Ponceau staining are shown as loading controls. Prior to loading, anti-mPAF15 immunoprecipitated material from wild-type ESCs was titrated (percentage indicated) to achieve levels of mPAF15 comparable to those from *Paf15* KRKR ESCs. AB, antibody. **c**, Quantification of anti-5mC staining in wild-type, *Dnmt1* KO, *Uhrf1* KO ESCs and two independent clones of *Paf15*K15R (K15R), *Paf15*K24R (K24R) and *Paf15*K15R/K24R (KRKR) mutant ESCs with  $n = 500$ -2500 cells per replicate. **d**, Comparison of the DNA methylation levels of individual CpG sites in wild-type and *Paf15* KRKR ESCs. **e**, DNA methylation levels of highly methylated domains (HMDs) and partially methylated domains (PMDs) in *Paf15* KRKR and wild-type (WT) ESCs. **f**, H3K9me2, H3K9me3 and H3K14ac density ( $\log_{10}$ ) at hypomethylated and unchanged tiles of *Paf15* KRKR mESCs. Differentially methylated tiles losing DNA methylation (hypomethylated tiles) were defined as those with  $P < 0.05$  and a methylation loss  $> 25\%$ ; P-values were derived from methylKit package (see Materials and Methods). For the boxplots in c, e and f, the horizontal black lines within boxes represent median values, boxes indicate the upper and lower quartiles, and whiskers indicate the 1.5x interquartile range. Source data are provided as a Source Data file.

**Supplementary Table 1. SAXS data collection parameters**

|                                                                           | hRFTS:<br>hPAF15 <sub>2-30</sub> Ub2 | hRFTS:<br>H31-37W-Ub2  | hRFTS                  | Ovalbumin  |
|---------------------------------------------------------------------------|--------------------------------------|------------------------|------------------------|------------|
| <b>Data collection parameters</b>                                         |                                      |                        |                        |            |
| Instrument                                                                | Photon Factory BL-10C                |                        |                        |            |
| Wavelength (Å)                                                            | 1.5                                  |                        |                        |            |
| $q$ range (Å <sup>-1</sup> )                                              | 0.0069–0.2781                        |                        |                        |            |
| Detector                                                                  | Pilatus3 2 M                         |                        |                        |            |
| Detector distance (mm)                                                    | 2,027                                |                        |                        |            |
| Exposure (s per image)                                                    | 20                                   |                        |                        |            |
| SEC Column                                                                | 5/150GL INCREASE Superdex200         |                        |                        |            |
| Flow rate (mL.min <sup>-1</sup> )                                         | 0.025                                |                        |                        |            |
| Injected sample conc.<br>(mg.mL <sup>-1</sup> )                           | 6.0                                  |                        |                        |            |
| Injection volume (μL)                                                     | 50                                   |                        |                        |            |
| Temperature (K)                                                           | 277                                  |                        |                        |            |
| <b>Structural parameters (data of extrapolated to zero concentration)</b> |                                      |                        |                        |            |
| $R_g$ (Å) [from $P(r)$ ]                                                  | 24.4 ± 0.2                           | 24.5 ± 0.2             | 21.7 ± 0.1             | 24.3 ± 0.1 |
| $R_g$ (Å) [from Guinier]                                                  | 24.4 ± 0.2                           | 24.3 ± 0.2             | 21.7 ± 0.2             | 24.1 ± 0.2 |
| $D_{max}$ (Å)                                                             | 77.4                                 | 78.1                   | 65.6                   | 75.1       |
| Porod volume estimate (Å <sup>3</sup> )                                   | 59,300                               | 57,700                 | 36700                  | 63,300     |
| <b>Molecular-mass determination</b>                                       |                                      |                        |                        |            |
| *Molecular mass $M_r$ [ $I(0)/c$ of standard]                             | 43.9 ± 1                             | 43.9 ± 3               | 29.6 ± 1               | -          |
| * $I(0)/c$ [from Guinier]                                                 | 0.046204 ±<br>0.001351               | 0.046238 ±<br>0.003432 | 0.031144 ±<br>0.001024 | 0.04679    |
| Calculated $M_r$ from sequence                                            | 48.0                                 | 48.9                   | 28.0                   | 44.4       |
| <b>Software employed</b>                                                  |                                      |                        |                        |            |
| Primary data reduction                                                    | SAnghar                              |                        |                        |            |
| Data processing                                                           | PRIMUS                               |                        |                        |            |
| <i>Ab initio</i> analysis                                                 | DAMMIF                               |                        |                        |            |
| Validation and averaging                                                  | DAMAVER & DAMMIN                     |                        |                        |            |
| Computation of model intensities                                          | CRYSOL                               |                        |                        |            |

<sup>1</sup>average and deviation are derived from the indicated frames in Supplementary Fig. 3d.

<sup>2</sup>sample concentration (mg/ml)



| Supplementary Table 2: RRBS Information |                |               |               |                   |
|-----------------------------------------|----------------|---------------|---------------|-------------------|
| Sample_ID                               | Genotype       | # total reads | #mapped reads | % of mapped reads |
| KRKR_1                                  | PAF15_KRKR_ESC | 28,140,727.00 | 19135694      | 68                |
| KRKR_2                                  | PAF15_KRKR_ESC | 35,670,848.00 | 26753136      | 75                |
| WT-1                                    | wt_J1_ESC      | 33,012,500.00 | 24429250      | 74                |
| WT-2                                    | wt_J1_ESC      | 21,910,914.00 | 15118530      | 69                |
| D1KO_r1                                 | DNMT1_KO_ESC   | 3,686,943.00  | 2617730       | 71                |
| D1KO_r2                                 | DNMT1_KO_ESC   | 3,846,150.00  | 2499998       | 65                |
| D1KO_r3                                 | DNMT1_KO_ESC   | 3,688,377.00  | 2508097       | 68                |
| U1KO_r1                                 | UHRF1_KO_ESC   | 3,248,968.00  | 2436726       | 75                |
| U1KO_r2                                 | UHRF1_KO_ESC   | 3,581,465.00  | 2399582       | 67                |
| U1KO_r3                                 | UHRF1_KO_ESC   | 3,680,511.00  | 2539553       | 69                |
| wt_r1                                   | wt_J1_ESC      | 3,229,351.00  | 2615775       | 81                |
| wt_r2                                   | wt_J1_ESC      | 2,956,850.00  | 2247206       | 76                |
| wt_r3                                   | wt_J1_ESC      | 3,081,518.00  | 2280324       | 74                |

| combined coverage of all samples over genomic elements |                              |
|--------------------------------------------------------|------------------------------|
| Genomic Element                                        | coverage [fraction of total] |
| Repeats                                                | 0.013915533                  |
| CpG islands                                            | 0.610142975                  |
| Promoters                                              | 0.430718894                  |
| Gene bodies                                            | 0.445765294                  |

Supplementary Table 3: Oligonucleotides used in this study

| Name    | Sequence 5'-3'                         | Description                   |
|---------|----------------------------------------|-------------------------------|
| 3621    | ATAGCGCTGGAGGGAATTCAGTGTAAACGCA        | xPAF15 amplification          |
| 3622    | AAAAGCAGCATGAATGCTCTAGTCCAGGCTT        | xPAF15 amplification          |
| 3667    | CGTGGATCCCCGAATTCATGGTGGGACTAAGGCAGA   | GST-xPAF15                    |
| 3636    | GGCCGCTCGAGTCGATTATTTACAAATATACAAAGC   | GST-xPAF15                    |
| 3720    | ggcgcggatcagatctcATGGTGGGACTAAGGCAGACT | pVL1392-xPAF15-Flag3          |
| 3581    | GGGCCCTCTAGAATTCTACTTGTATCGTCATCCT     | pVL1392-xPAF15-Flag3          |
| 3707    | AgGGCTGTTGCTGCCAGAGCACCAAGGA           | xPAF15 K18R mutation          |
| 3708    | CCTGTAGCTCCCCGATGAAGAGCCC              | xPAF15 K18R mutation          |
| 3709    | AgAACATTTGGGAGTAGTTCAGTGGTT            | xPAF15 K27R mutation          |
| 3710    | CCTTGGTGTCTGGCAGCAACAGCC               | xPAF15 K27R mutation          |
| 3711    | gcCgcTGGATCACCATCCACAAGTCAGCCTG        | xPAF15F72AF73A mutation       |
| 3712    | GTCTCCTATACCTTTTCTGCCAGGTA             | xPAF15F72AF73A mutation       |
| 3896    | gcGACTAAGGCAGACTGCGCGGGCTCTT           | pKS104-xPAF15R3A<br>mutation  |
| 3897    | CACCATGAATTCGAGTGCAAAAA                | xPAF15R3A mutation            |
| 3898    | CGGgaTAAGGCAGACTGCGCGGGCTCTT           | xPAF15T3D mutation            |
| 3899    | CGGACTgcGGCAGACTGCGCGGGCTCTT           | xPAF15K4A mutation            |
| 4449    | CACCATGAGATCTGATCCGCGCCCG              | pVL1392-xPAF15R3A<br>mutation |
| 4620    | GGCGCGGATCAGATCTCATGTGGATACAGGTGCGTAC  | pVL1392-xUHRF1-Flag3          |
| 4271    | GCCATGGCGTTTCACATTTATGCGCTTA           | xUHRF1D333A mutation          |
| 4272    | ACACTCATCACAAGAAGTTGTTTC               | xUHRF1D333A mutation          |
| 4273    | GCTGAGTGTGCCATGGCGTTTCACATTT           | xUHRF1D333AD336A<br>mutation  |
| 4274    | ACAAAGAAGTTGTTTCTCTGGGTCC              | xUHRF1D333AD336A<br>mutation  |
| Dnmt1_F | GGCGGAAATCAAAGGAGGAT                   | RT-qPCR                       |
| Dnmt1_R | CCTGGGCTGGAACCTCTTTTATC                | RT-qPCR                       |
| Uhrf1_F | GGCAGCTGAAGCGGATGA                     | RT-qPCR                       |
| Uhrf1_R | CCATGCACCGAAGATATTGTCA                 | RT-qPCR                       |

|                            |                                                                                                                                                                                                                     |                                                 |
|----------------------------|---------------------------------------------------------------------------------------------------------------------------------------------------------------------------------------------------------------------|-------------------------------------------------|
| PAF15_F                    | CAAGTTCGTCGAGAAAAGCTGA                                                                                                                                                                                              | RT-qPCR                                         |
| PAF15_R                    | ACAGCCTGAAGAATTCCCCG                                                                                                                                                                                                | RT-qPCR                                         |
| Gapdh_F                    | CATGGCCTTCCGTGTTCTTA                                                                                                                                                                                                | RT-qPCR                                         |
| Gapdh_R                    | CTTACCACCTTCTTGATGTCATC                                                                                                                                                                                             | RT-qPCR                                         |
| PAF15_K15_gRNA_F           | CACCGCATCATTTACCTTTTCTGT                                                                                                                                                                                            | Cloning gRNAs                                   |
| PAF15_K15_gRNA_R           | aaacACAGAAAAGTAAATGATGC                                                                                                                                                                                             | Cloning gRNAs                                   |
| PAF15_K24_gRNA_F           | CACCGAGCCAAGCACCTTCCTAG                                                                                                                                                                                             | Cloning gRNAs                                   |
| PAF15_K24_gRNA_R           | aaacCTAGGAAGGTGCTTGGCTCC                                                                                                                                                                                            | Cloning gRNAs                                   |
| PAF15_K15_scrF             | CGGGAAGAGACCCATTTAAAC                                                                                                                                                                                               | PCR and RFLP Analysis                           |
| PAF15_K15_scrR             | GCCTTCTAGTGCTCAATGG                                                                                                                                                                                                 | PCR and RFLP Analysis                           |
| PAF15_K24_scrF             | CTGGCCTGGGACTGTTGTAG                                                                                                                                                                                                | PCR and RFLP Analysis                           |
| PAF15_K24_scrR             | CAGGTTAGTACTGCCTTGCC                                                                                                                                                                                                | PCR and RFLP Analysis                           |
| Paf15_K15R_Donor           | CCTGCCTTCTAGTGCTCAATGGGAGGCAGCCATGGGCGTCTCCACCCCT<br>GGACAGGCTGCCTAGGGAACCCCTGCCACCTCGCTGCATCATTTACCgc<br>gTCTGTATGCTCCTGGAACGTAGTTTGTCTTGGTCCGCACCATGTTTACA<br>CAAGAAGAGACAACCTTTCACCGTCACCCCAACTGCAGATGTCTCAATTAG | ssDNA Donor<br>Oligonucleotides                 |
| Paf15_K24R_Donor           | ATGCTCTCGGGTGTACTTCTCAGAAGCTTCCACGACCTTCTTACCTTTT<br>CTCGACGAACTTGAAGAATTGGTGACAAAGGTGGAGGAGCCAAGCACgcg<br>CCTAGGTGCTTGAGAAGCCACCGCTGCAGAGAGAGATAAATAGGGCGTT<br>CAGAAAAGGCAGGAGGTTTCGGATCCCCGAGCTTTGTTCTACAACAGTC   | ssDNA Donor<br>Oligonucleotides                 |
| hPAF15_F                   | ATGGTGCGGACTAAAGCAGACAGTGTCCAGGCACCTACAGAAAA                                                                                                                                                                        | hPAF15 amplification                            |
| hPAF15_R                   | CTATTCTTTTTCATCATTTGTGTGATCAGGTTGCAAAGGACATGC                                                                                                                                                                       | hPAF15 amplification                            |
| hPAF15_72stop_F            | TAGGTTGTAACCTAAAGATTCTGAAAAAGA                                                                                                                                                                                      | hPAF15 <sub>2-71</sub>                          |
| hPAF15_72stop_R            | CTTTAGGTTTACAACCTAAAGAATTCTCCAA                                                                                                                                                                                     | hPAF15 <sub>2-71</sub>                          |
| N <sup>PfO</sup> -hPAF15_F | CATTATGGGTAAGTGTGCGTGCAGCTAAAGCAGACAGTGTTC                                                                                                                                                                          | pET21b-N <sup>PfO</sup> -hPAF15 <sub>2-71</sub> |
| N <sup>PfO</sup> -hPAF15_R | TCCGACATTTGGTCTTATTACAACCTAAAGAATTCTCCAATTCCT                                                                                                                                                                       | pET21b-N <sup>PfO</sup> -hPAF15 <sub>2-71</sub> |
| hPAF15_K15C/K24C-F         | TACAGATGTGTGGTGGCTGCTCGAGCCCCAGATGTGTGCTTGGTCTTC                                                                                                                                                                    | hPAF15 K15C/K24C                                |
| hPAF15_K15C/K24C-R         | AAGCACACATCTGGGGCTCGAGCAGCCACCACACATCTGTAAGTGCCTG                                                                                                                                                                   | mutation                                        |
| hPAF15_C54S-F              | CCCCGTTTCCGTGCGCCCAACTCCCAAGTG                                                                                                                                                                                      | hPAF15 C54S mutation                            |
| hPAF15_C54S-R              | GGCGCACGGAACGGGGTTCCCTCCTGCAT                                                                                                                                                                                       | hPAF15 C54S mutation                            |
| PAF15_HA_F                 | TACCCATACGATGTCCAGATTACGCTTAATAAGACCAAATGTCGGATCCACTAGTG                                                                                                                                                            | hPAF15 <sub>2-71</sub> -HA                      |
| PAF15_HA_R                 | AGCGTAATCTGGAACATCGTATGGGTACAACCTAAAGAATTCTCCAATTCCTTTTGG                                                                                                                                                           | hPAF15 <sub>2-71</sub> -HA                      |

|                     |                                               |                                    |
|---------------------|-----------------------------------------------|------------------------------------|
| PAF15_R2A_F         | TTGCGTGGCCACTAAAGCAGACAGTGTTC                 | hPAF15 R2A mutation                |
| PAF15_R2A_R         | CTTTAGTGGCCACGCAACTAGTTACCCATA                | hPAF15 R2A mutation                |
| PAF15_T3D_F         | CGTGCGGGACAAAGCAGACAGTGTCCAGG                 | hPAF15 T3D mutation                |
| PAF15_T3D_R         | CTGCTTGTCCCGCAGCAACTAGTTACCC                  | hPAF15 T3D mutation                |
| PAF15_K4A_F         | GCGGACTGCCGCAGACAGTGTCCAGGCAC                 | hPAF15 K4A mutation                |
| PAF15_K4A_R         | TGTCTGCGGCAGTCCGCACGCAACTAGTTA                | hPAF15 K4A mutation                |
| UBCh5a-F            | ATGGCGCTGAAGAGGATTCAGAAAGAATTGAGTGATCTACAGCGC | hUBCh5 amplification               |
| UBCh5a-R            | TTACATTGCATATTTCTGAGTCCATTCTCTGCATGTCTGTTGTA  | hUBCh5 amplification               |
| UHRF1_D334A/D337A_F | TGTGCGCTGAGTGCGCCATGGCCTTCCACA                | hUHRF1 D334A and D337A<br>mutation |
| UHRF1_D334A/D337A_R | CCATGGCGCACTCAGCGCACATGAGCTGCT                |                                    |
| UHRF1_H741A_F       | GTGCCAGGCCAACGTGTGCAAGGACTGCCT                | hUHRF1 H741A mutation              |
| UHRF1_H741A_R       | ACACGTTGGCCTGGCACACGGTCGTGATGG                |                                    |
