# Supplementary material for: Two distinct modes of DNMT1 recruitment ensure stable maintenance DNA methylation
Source: PubMed Central journal article supplement (PMC7060239; doi:10.1038/s41467-020-15006-4), 2020-03-06
Supplement: 41467_2020_15006_MOESM4_ESM.pdf [file 41467_2020_15006_MOESM4_ESM.pdf]

## Description of Additional Supplementary Files

File Name: Supplementary Data 1

Description: This file contains the MS-based quantification of DNMT1 interacting chromatin proteins.

File Name: Supplementary Data 2

Description: This file contains the list of identified ubiquitylated peptides in xDNMT1 pull-down.

File Name: Supplementary Data 3

Description: This file contains the list of identified phosphorylated peptides in xDNMT1 pull-down.
